# Supplementary material for: Time Course of Asymptomatic Stenosis in Multiple Lumbar Spinal Stenosis—Five-Year Results of Selective Decompression of Symptomatic Levels
Source: MDPI journal article supplement (doi:10.3390/medicina60040636), 2024-04-15
Supplement: s1 [file s1]

**Supplementary Table S1.** Preoperative comparison between cases with or without follow-up for 5 years after surgery

|                          | Follow-up (+)<br>Mean [SD], n (%) | Follow-up (-) | P-value |
|--------------------------|-----------------------------------|---------------|---------|
| Cases                    | 98                                | 39            |         |
| Age (y)                  | 66.8 [8.8]                        | 67.9 [11.7]   | 0.42    |
| Sex                      |                                   |               | 0.81    |
| Male                     | 60 (61.2)                         | 23 (59)       |         |
| Female                   | 38 (38.8)                         | 16 (41)       |         |
| BMI (kg/m <sup>2</sup> ) | 25.0 [2.9]                        | 25.7 [4.2]    | 0.15    |
| Smoking                  |                                   |               | 0.32    |
| No                       | 63 (64.3)                         | 26 (66.7)     |         |
| Past                     | 22 (22.5)                         | 5 (12.8)      |         |
| Present                  | 13 (13.3)                         | 8 (20.5)      |         |
| DM                       | 15 (15.3)                         | 7 (18.0)      | 0.70    |
| L3–4 DSCA                | 89.6 [37.7]                       | 104.7 [46.2]  | 0.07    |
| L3–4 stenosis            | 12 (12)                           | 4 (10)        | 0.74    |
| L4 spondylolisthesis     | 40 (40.8)                         | 21 (53.9)     | 0.17    |
| MEL                      | 22 (22.5)                         | 13(33.3)      | 0.19    |
| NRS scores               |                                   |               |         |
| Low back pain            | 3.9 [3.3]                         | 4.2 [3.4]     | 0.66    |
| Leg pain                 | 5.4 [3.2]                         | 4.7 [3.6]     | 0.46    |
| Leg numbness             | 5.6 [3.2]                         | 6.5 [2.8]     | 0.17    |
| RDQ total score          | 11.3 [5.8]                        | 10.5 [5.1]    | 0.80    |
| RDQ deviation score      | 39.2 [10.2]                       | 39.2 [8.7]    | 0.88    |

DM: diabetes mellitus; DSCA: dural sac cross-sectional area; NRS: numerical rating scale;

RDQ: Roland–Morris Disability Questionnaire; SD: standard deviation.
